# Supplementary material
Source: Springer Nature journal article supplement (https://www.springermedizin.de/resource/supplementary/12885_2010_2738_MOESM2_ESM.pdf/9461838)

A. Modelled HPV prevalence compared to measured cross-sectional rates in Yangcheng County, Shanxi Province

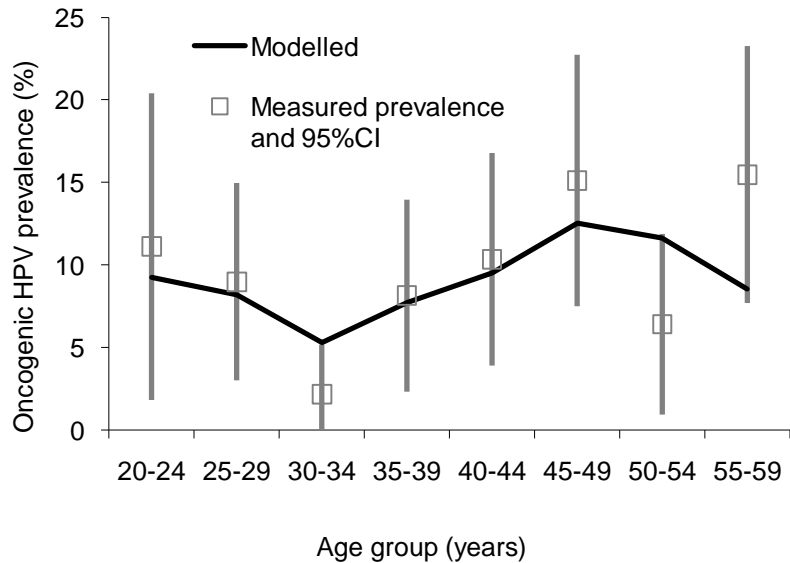

B. Modelled cancer incidence compared to rates observed in unscreened populations

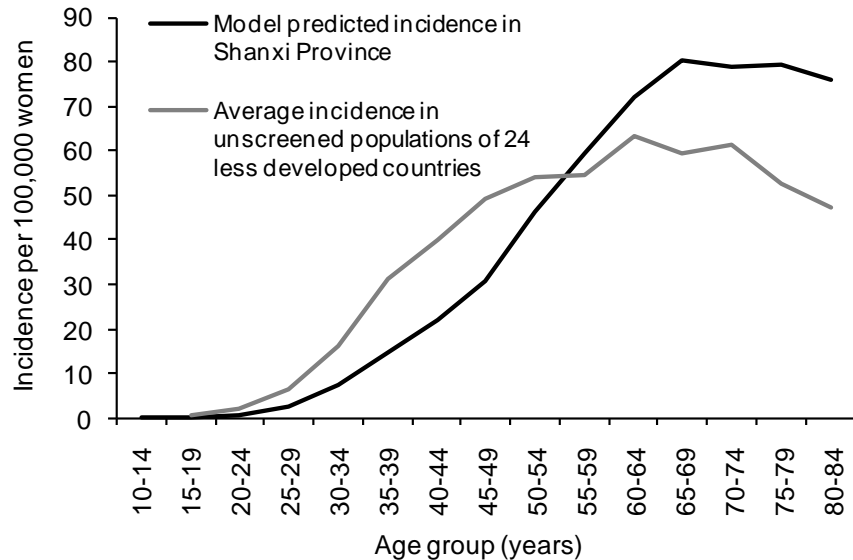

Supplement: MOESM2 [file 9461838]
